# Supplementary material
Source: PubMed Central journal article supplement (PMC3491955)
Supplement: supp_kfs194_toxsci-12-0410-File009.pdf [file supp_kfs194_toxsci-12-0410-File009.pdf]

# Identification of the Ah-receptor structural determinants for ligand preferences

## Supplemental materials:

**Figure S1**

**Figure S2**

**Figure S3**

**Figure S4**

Yongna Xing<sup>1,2,5</sup>, Manabu Nukaya<sup>1,3</sup>, Kenneth A Satyshur<sup>1</sup>, Li Jiang<sup>1</sup>, Vitali Stanevich<sup>1</sup>, Elif Nihal Korkmaz<sup>4</sup>, Lisa Burdette<sup>1</sup>, Gregory D. Kennedy<sup>3</sup>, Qiang Cui<sup>4</sup>, Christopher A. Bradfield<sup>1,2</sup>

<sup>1</sup>McArdle Laboratory for Cancer Research, Department of Oncology, University of Wisconsin, School of Medicine and Public Health, Madison, Wisconsin 53706, USA

<sup>2</sup>Molecular and Environmental Toxicology Center, University of Wisconsin at Madison, Madison, Wisconsin 53706, USA

<sup>3</sup>Department of Surgery, University of Wisconsin School of Medicine and Public Health, Madison, Wisconsin 53706, USA

<sup>4</sup>Department of Chemistry and Theoretical Chemistry Institute, University of Wisconsin, Madison, Wisconsin 53706, USA

<sup>5</sup>To whom correspondence should be addressed:

E-mail: [xing@oncology.wisc.edu](mailto:xing@oncology.wisc.edu);

Phone 608-262-8376

Fax 608-262-2824

McArdle Laboratory for Cancer Research  
1400 University Avenue  
Madison, WI, 53706

|               |                                                              |     |     |                           |     |
|---------------|--------------------------------------------------------------|-----|-----|---------------------------|-----|
|               | 290                                                          | 300 | 310 | 320                       | 330 |
| mAHR-B        | KHKLDFTPI GCDAKGQLI LGYTEVELCTRGSGYQFI HAADI LHCAESHI RMI KT |     |     |                           |     |
| HIF2 $\alpha$ | EHSMDMKFTYCDDRI TELI GYHPEELLGR- SAYEFYHALDSENMTKSHQNLCTK    |     |     |                           |     |
|               |                                                              |     |     | "belt"                    |     |
|               | 340                                                          | 350 | 360 | 370                       | 380 |
| mAHR-B        | TGESGMTVFRL LAKHSRWRWVQSNARLI Y - - RNGRPDYI I ATQRPLTDEEGR  |     |     |                           |     |
| HIF2 $\alpha$ | KGQVVSGQYRML AKHGGYVWLETQGTVI YNPRNLQPQCI MCVNYVLSEI EKN     |     |     |                           |     |
|               |                                                              |     |     | H $\beta$ -I $\beta$ loop |     |

**Figure S1.** Sequence alignment of human HIF2 $\alpha$  and the B allele of mouse AHR. The "belt" sequence and loop H $\beta$ -I $\beta$  are highlighted. Identical residues are highlighted in yellow.

**A**

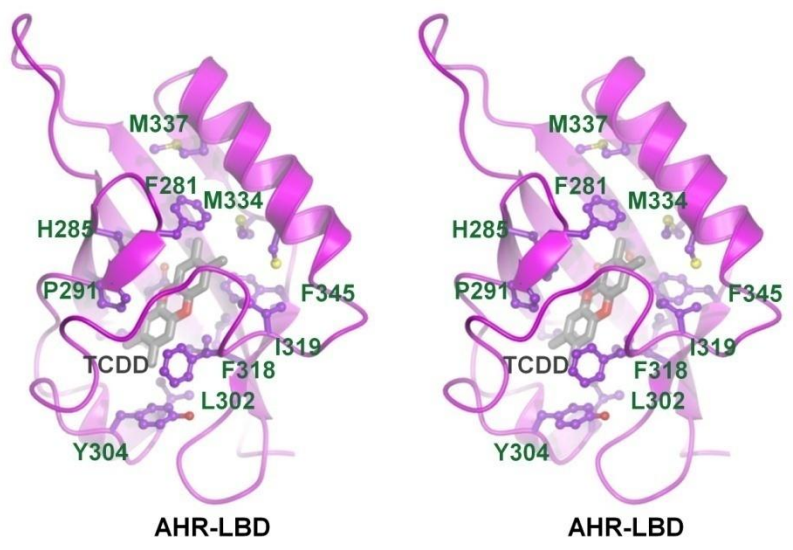

**B**

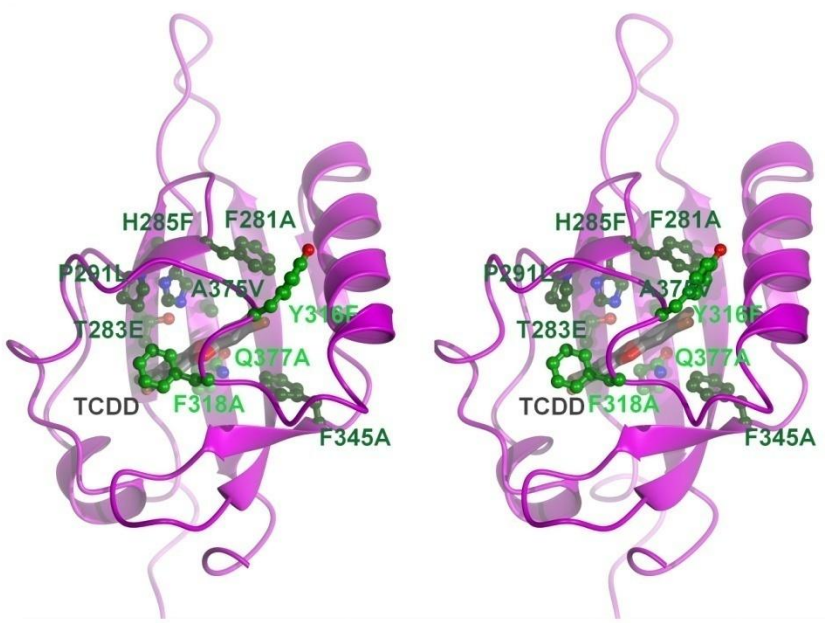

**Figure S2.** The AHR residues lining the ligand binding pocket. (A) Stereo of the model of the mAHR-LBD bound to TCDD, illustrating residues lining the ligand binding pocket. These include F281, T283, H285, F289, P291, L302, Y304, F318, I319, C327, M334, M337, F345, L347, V357, S359, A375, Q377, and are selectively labeled. (B) Stereo of the model of the mAHR-LBD bound to TCDD, illustrating mutations shown in previous studies (29) that abolish (dark green) or compromise ligand binding (green).

|         |                                                                |     |     |     |     |
|---------|----------------------------------------------------------------|-----|-----|-----|-----|
|         | 290                                                            | 300 | 310 | 320 | 330 |
| AHR-B   | IFRTKHKLDFTPIGCDAGQLILGYTEVELCTRGSYQFIHAADILHCAES              |     |     |     |     |
| AHR-D   | IFRTKHKLDFTPIGCDAGRIVLGYTEAELCTRGSYQFIHAADMLYCAES              |     |     |     |     |
| drAHR1a | MFKTK <b>Y</b> KLDFTPIACDTNWNFVLGYTEAELCNSGSYQFIHAADMMYCAEG    |     |     |     |     |
|         | 340                                                            | 350 | 360 | 370 |     |
| AHR-B   | HIRMIKTGESGMTVFRL LAKHSRWRWVQSNARLIYRNGRPDYIIATQRP .           |     |     |     |     |
| AHR-D   | HIRMIKTGESGMI VFRL LTKNNRWTWVQSNARLLYKNGRPDYII <b>V</b> TQRP . |     |     |     |     |
| drAHR1a | HMRMMRTGETGLTVFRL LTKQNRWVWVQSNGLVYKNGQPDCI <b>I</b> TSHRV .   |     |     |     |     |

**Figure S3.** Sequence alignment of mouse AHR B-allele, D-allele, and the nonfunctional allele of zebra fish (drAHR1a). Identical residues are highlighted in yellow. V375 in mouse D-allele and Y285/T375 in drAHR1a are highlighted in bold.

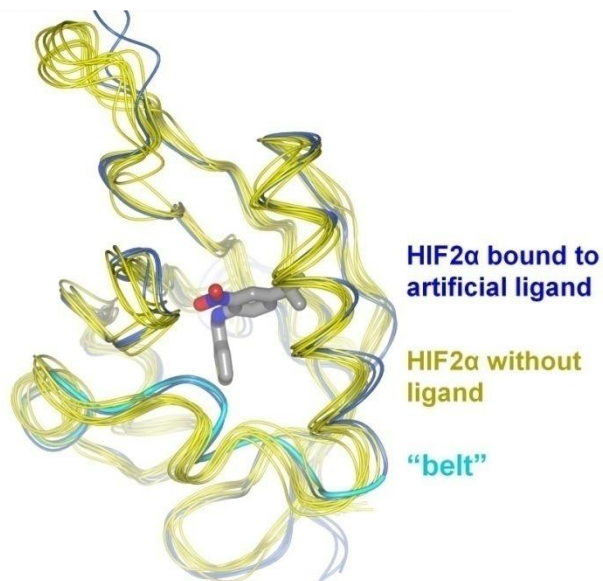

**Figure S4.** Alignment of crystal structures of HIF2 $\alpha$  bound to artificial ligands (PDB codes: 3H7W, 3H82, 3F1N) (blue) and its NMR structures in the absence of ligands (PDB code: 2A24) (yellow). The “belt” in 3H7W is shown in cyan.
